1 **The tolerance to hypoxia is defined by a time-sensitive response of the**  
2 **gene regulatory network in sea urchin embryos**

3 **Running title: Regulatory response to hypoxia**

4 Majed Layous, Lama Khalaily, Tsvia Gildor and Smadar Ben-Tabou de-Leon\*

5 Department of Marine Biology, Leon H. Charney School of Marine Sciences, University of Haifa,  
6 Haifa 31905, Israel.

7 \*Correspondence: Smadar Ben-Tabou de-Leon ([sben-tab@univ.haifa.ac.il](mailto:sben-tab@univ.haifa.ac.il))

8

9 Key words:

10 Hypoxia, Gene regulatory networks, Sea urchin, Deoxygenation, Evolution and development,  
11 Skeletogenesis

12

13 **Summary statement** (<=30 words)

14 The use of hypoxia and redox gradients as morphogens makes sea urchin early development  
15 sensitive to environmental hypoxia. This sensitivity decreases later, due to the structure of the gene  
16 regulatory network.

17

18

19 **Abstract (<=180 words)**

20 Deoxygenation, the reduction of oxygen level in the oceans induced by global warming and  
21 anthropogenic disturbances, is a major threat to marine life. This change in oxygen level could be  
22 especially harmful to marine embryos that utilize endogenous hypoxia and redox gradients as  
23 morphogens during normal development. Here we show that the tolerance to hypoxic conditions  
24 changes between different developmental stages of the sea urchin embryo, due to the structure of  
25 the gene regulatory networks (GRNs). We demonstrate that during normal development, bone  
26 morphogenetic protein (BMP) pathway restricts the activity of the vascular endothelial growth  
27 factor (VEGF) pathway to two lateral domains and by that controls proper skeletal patterning.  
28 Hypoxia applied during early development strongly perturbs the activity of Nodal and BMP  
29 pathways that affect VEGF pathway, dorsal-ventral (DV) and skeletogenic patterning. These  
30 pathways are largely unaffected by hypoxia applied after DV axis formation. We propose that the  
31 use of redox and hypoxia as morphogens makes the sea urchin embryo highly sensitive to  
32 environmental hypoxia during early development, but the GRN structure provides higher tolerance  
33 to hypoxia at later stages.

34

## 35 **Introduction**

36 During the evolution of metazoans, animals were exposed to variations in oxygen levels and  
37 molecular mechanisms evolved to enable organisms to cope with hypoxic conditions (Semenza,  
38 2012). However, it is still unclear whether these mechanisms are sufficient to protect marine  
39 organisms and specifically, their embryos, from the acute hypoxic conditions that become more  
40 common in the oceans (Altieri et al., 2017; Breitburg et al., 2018; Hughes et al., 2020). In the last  
41 50 years the dissolved oxygen (O<sub>2</sub>) content of the global ocean has decreased by more than 2%,  
42 apparently due to warming that reduces oxygen solubility and increases biological consumption  
43 (Schmidtko et al., 2017). Recent studies indicate that oxygen loss in the oceans, termed  
44 deoxygenation, is more lethal to marine life than the direct effect of the rising temperatures or ocean  
45 acidification (Altieri et al., 2017; Breitburg et al., 2018; Hughes et al., 2020; Schmidtko et al., 2017;  
46 Vaquer-Sunyer and Duarte, 2008). The embryos of marine organisms could be highly sensitive to  
47 deoxygenation; especially embryos that use endogenous hypoxia and redox gradients as  
48 morphogens to guide the activation of gene regulatory networks (GRNs) during normal  
49 development (Chang et al., 2017; Coffman and Su, 2019; Cordeiro and Tanaka, 2020; Dunwoodie,  
50 2009; Lendahl et al., 2009). Deciphering the structure and function of developmental GRNs that  
51 are activated by hypoxia and redox morphogens is a key to understand this fundamental regulatory  
52 mechanism as well as to assess the expected effect of ocean deoxygenation on marine embryos.

53 The sea urchin embryo provides an attractive system to study the developmental GRNs that are  
54 driven by variation in oxygen and redox levels and the effect of hypoxic conditions on these GRNs.  
55 Sea urchins are major grazers in shallow seas and coastal waters across the oceans (Pearse, 2006)  
56 and adult sea urchins were shown to be moderately sensitive to hypoxic conditions (Hughes et al.,  
57 2020; Low and Micheli, 2018; Suh et al., 2014; Vaquer-Sunyer and Duarte, 2008). The  
58 experimental advantages of sea urchin embryos and the role of the sea urchins in marine ecology  
59 make them a prominent model system for developmental and ecological studies (Pearse, 2006;  
60 Peter and Davidson, 2011; Sethi et al., 2012). The models of the gene regulatory networks that  
61 drive sea urchin early development are the state of the art in the field (Morgulis et al., 2019; Oliveri  
62 et al., 2008; Peter and Davidson, 2011). Importantly, the sea urchin GRNs use endogenous oxygen  
63 and redox gradients as developmental morphogens that drive the formation of the dorsal-ventral  
64 (DV) axis (Chang et al., 2017; Coffman et al., 2014; Suh et al., 2014).

65 During early development of the sea urchin embryo, maternally induced oxygen and redox  
66 gradients initiate the localized activity of several signaling pathways that eventually control the  
67 patterning along the DV axis (Fig. 1, (Chang et al., 2017; Coffman et al., 2014; Suh et al., 2014)).

68 In the eggs of the sea urchins, the mitochondria are concentrated at the future ventral side (Coffman  
69 et al., 2004; Coffman et al., 2014), which leads to the formation of redox and oxygen gradients in  
70 the early embryos (Fig. 1A, (Agca et al., 2009; Coffman et al., 2004)). Specifically, the  
71 mitochondria produces reactive oxygen species (ROS) that generate an oxidizing environment  
72 which activate redox sensitive transcription factors that activate the expression of the Nodal ligand  
73 in the ventral ectoderm (Agca et al., 2009; Coffman et al., 2004; Coffman et al., 2014). Nodal  
74 reception drives the expression of the Nodal ligand and its antagonist Lefty and the positive and  
75 negative feedback interactions between these two proteins define the boundaries of the ventral  
76 ectoderm (Fig. 1B, (Duboc et al., 2008; Duboc et al., 2004)). Nodal activity drives the expression  
77 of the Bone Morphogenetic Protein (BMP), BMP2/4, and its antagonist Chordin, forming an  
78 incoherent feedforward loop (Fig. 1C, (Agca et al., 2009; Coffman et al., 2004; Coffman et al.,  
79 2014)). Chordin prevents the binding of BMP2/4 to its receptor at the ventral side so BMP is  
80 received only at the dorsal side where it activates gene expression through the phosphorylation of  
81 the transcription factor SMAD1/5/8 (Ben-Tabou de-Leon et al., 2013; Duboc et al., 2004; Lapraz  
82 et al., 2009) (Fig. 1C, D). Another early regulator of dorsal gene expression is the transcription  
83 factor, hypoxia-inducible factor 1 $\alpha$  (HIF1 $\alpha$ ) that is stabilized in the dorsal side of the sea urchin  
84 blastula, apparently downstream of the oxygen gradient (Fig. 1A, B, (Ben-Tabou de-Leon et al.,  
85 2013; Chang et al., 2017; Coffman et al., 2009)). Thus, sea urchin embryos use the Nodal and BMP  
86 pathways and HIF1 $\alpha$  to generate their DV axis downstream of redox and oxygen gradients inherited  
87 from the sea urchin egg.

88 Growth in hypoxic conditions leads to radialization of sea urchin embryos with prominent effects  
89 on the larval skeleton (Agca et al., 2009; Coffman et al., 2004). The skeleton of the sea urchin  
90 larvae is made of two skeletal calcite rods, the spicules, that are formed within a tubular syncytial  
91 chord produced by the skeletogenic cells (Morgulis et al., 2019; Oliveri et al., 2008). When the  
92 embryos are grown in hypoxic conditions the formation of the DV axis and the skeleton are  
93 disrupted, the spicules do not elongate properly and the embryonic morphology is significantly  
94 deformed (Agca et al., 2009; Coffman et al., 2004).

95 Sea urchin skeletogenesis depends on the Vascular Endothelial Growth Factor (VEGF) pathway,  
96 an essential regulator of vertebrates' vascularization and of tubulogenesis in other phyla (Potente  
97 et al., 2011; Tettamanti et al., 2003; Tiozzo et al., 2008; Yoshida et al., 2010). The VEGF Receptor  
98 (VEGFR) is expressed in the sea urchin skeletogenic cells together with five transcription factors  
99 whose homologs are essential for vertebrates' vascularization (Adomako-Ankomah and Etensohn,  
100 2013; Duloquin et al., 2007; Morgulis et al., 2019; Sun and Etensohn, 2014). This and other

101 similarities between the sea urchin skeletogenic gene regulatory network (GRN) and the  
102 vertebrates' vascularization GRN suggest that these GRNs evolved from a common ancestral  
103 tubulogenesis GRN (Morgulis et al., 2019). The VEGF ligand is secreted from two lateral  
104 ectodermal domains located between the dorsal and the ventral ectoderm (Fig. 1D, (Adomako-  
105 Ankomah and Ettensohn, 2013; Duloquin et al., 2007; Morgulis et al., 2019)). VEGF expression  
106 is repressed in the ventral ectoderm by the transcription factor Not1 that is activated by Nodal  
107 signaling (Fig. 1D, (Li et al., 2012)). Yet, the regulatory links between BMP, HIF1 $\alpha$  and VEGF  
108 signaling and how VEGF and BMP pathways are affected by hypoxia are not known.

109 Overall, sea urchin DV axis formation and skeletogenesis are strongly affected by hypoxic  
110 conditions and are regulated by Nodal, BMP, VEGF and HIF1, downstream of maternal oxygen  
111 and redox gradients (Fig. 1). To understand the effect of exogenous hypoxia on sea urchin  
112 development, here we study the regulatory links between the sea urchin DV and skeletogenic GRNs  
113 during normal development and under hypoxia applied at different developmental stages. We  
114 reveal that these two GRNs are strongly connected through the interactions between the BMP and  
115 VEGF pathways and that the DV GRN is hypersensitive to hypoxia during early development but  
116 becomes relatively tolerant to low oxygen levels with developmental progression.

## 117 **Results**

### 118 **Sea urchin BMP2/4 controls skeletal patterning and VEGF expression**

119 We first wanted to elucidate the links between BMP and VEGF signaling and the effect of BMP  
120 signaling on skeletogenic gene expression during normal sea urchin development. To that end, we  
121 knocked-down (KD) BMP2/4 expression by the injection of translation morpholino  
122 oligonucleotides (MO) into the eggs of the Mediterranean sea urchin species, *Paracentrotus lividus*  
123 (*P. lividus*, Fig. 2, see methods for details). Embryos injected with BMP2/4 MO show two major  
124 skeletogenic phenotypes: the formation of ectopic spicules in addition to the normal two spicules  
125 (ES, Fig. 2B) and ectopic skeletal branching, where the basic structure of two spicules is still  
126 observed (EB, Fig. 2C). These observations are in agreement with previous studies of BMP  
127 perturbations (Duboc et al., 2004; Lapraz et al., 2009). The expression level of *VEGF* is largely  
128 unchanged in BMP morphants (QPCR, Fig. 2G) but its spatial expression expands to one side of  
129 the ectoderm (detected by whole mount *in-situ* hybridization [WMISH], Fig. 2D). Since BMP  
130 signaling induces dorsal specification (Duboc et al., 2004; Lapraz et al., 2009), *VEGF* expansion  
131 in BMP morphants is most likely, to the domain that would normally be specified as dorsal  
132 ectoderm. Hence, this data implies that BMP activity represses *VEGF* expression in the dorsal  
133 ectoderm in normal embryos.

134 To further understand the regulatory links between the ectoderm and the skeletogenic GRNs, we  
135 studied the effect of BMP2/4 KD on the spatial expression of *VEGFR* and its target gene, the  
136 Spicule-Matrix protein 30 (*SM30*), at the gastrula stage (Duloquin et al., 2007; Morgulis et al.,  
137 2019). In control embryos, the expression of *VEGFR* is localized to the two skeletogenic cell  
138 clusters where the spicules first form (Fig. 2E) and the expression of *SM30* is noticeably enhanced  
139 in these clusters (Fig. 2F). BMP2/4 KD leads to two distinct expansion patterns of the expression  
140 of *VEGFR* and *SM30* (Fig. 2E, F). Some embryos show a continuous expansion of *SM30* and  
141 *VEGFR* expression throughout the dorsal skeletogenic cells which could drive the ectopic  
142 branching phenotype (EB in Fig. 2E, F). However, in some embryos *VEGFR* and *SM30* are  
143 expressed in three or four distinct cell clusters, which could be the cell clusters where ectopic  
144 spicules form in BMP2/4 KD (ES in Fig. 2E, F). The levels of *VEGFR* and *SM30* mRNA do not  
145 show significant change in BMP2/4 MO at one and two days post fertilization (dpf, Fig. 2G).  
146 Overall, the expression of *VEGFR* and *SM30* expands in BMP KD, which could underlie the growth  
147 of ectopic spicules and ectopic spicule branches in this condition.

148 The expansion of *VEGFR* and *SM30* expression in BMP morphants is probably due to the  
149 combination of direct and indirect regulation of these genes by BMP signaling. *VEGFR* and *SM30*  
150 could be directly repressed by the BMP pathway through the phosphorylation of the transcription  
151 factor SMAD1/5/8 in the dorsal skeletogenic cells. Phosphorylated SMAD1/5/8 (pSMAD1/5/8) is  
152 indeed detected in the dorsal skeletogenic cells at the gastrula stage (Lapraz et al., 2009; Lapraz et  
153 al., 2006; Luo and Su, 2012) (Fig. 1D), where it activates the expression of *tbx2/3* and *gatac* (Duboc  
154 et al., 2010). The expression of *VEGFR* and *SM30* in BMP morphants could be also enhanced  
155 indirectly, through the expansion of *VEGF* expression in these embryos (Fig. 2D). Together, our  
156 results suggest that BMP2/4 signaling controls sea urchin skeletal patterning, through the repression  
157 of *VEGF* expression in the dorsal ectoderm, and the repression of *VEGFR* and *SM30* in the dorsal  
158 skeletogenic cells.

### 159 **HIF1 $\alpha$ does not regulate skeletal patterning and VEGF expression in the sea urchin embryo**

160 HIF1 is one of the most potent factors in the hypoxia pathway and specifically, it activates *VEGF*  
161 expression during hypoxia induced vascularization in vertebrates (Carmeliet, 2005; Pagès and  
162 Pouyssegur, 2005). Since the sea urchin HIF1 $\alpha$  was shown to participate in early DV specification  
163 (Ben-Tabou de-Leon et al., 2013; Chang et al., 2017), we wanted to study the effect of the  
164 perturbation of this gene on sea urchin *VEGF* expression. In the sea urchin species,  
165 *Strongylocentrotus purpuratus* (*S. purpuratus*), HIF1 $\alpha$  KD reduced the early expression of the  
166 dorsal transcription factors, *Tbx2/3* and *Dlx*, reduced the extension of the dorsal apex and mildly

167 reduced the elongation of the dorsal skeletal rods (Ben-Tabou de-Leon et al., 2013; Chang et al.,  
168 2017). To study the effect of HIF1 $\alpha$  perturbation on *VEGF* expression we injected HIF1 $\alpha$   
169 translation MO into the eggs of the sea urchin, *P. lividus* (Fig. 3). HIF1 $\alpha$  KD did not result with  
170 distinct skeletogenic phenotypes, in agreement with its weak effect on *S. purpuratus* skeletogenesis  
171 (Chang et al., 2017) (Fig. 3A).

172 We tested the effect of HIF1 $\alpha$  KD on gene expression level at two developmental time points: 15  
173 hours post-fertilization (hpf) which is equivalent to the developmental time where HIF1 $\alpha$  activates  
174 its dorsal target genes in *S. purpuratus*, and 19hpf, when the effect of HIF1 $\alpha$  perturbation starts to  
175 decrease in *S. purpuratus* (Ben-Tabou de-Leon et al., 2013). HIF1 $\alpha$  KD decreases the expression  
176 level of its known target genes, *Pl-tbx2/3* and *Pl-dlx*, with a stronger reduction in the earlier time  
177 point, similarly to its effect in *S. purpuratus* (Ben-Tabou de-Leon et al., 2013), supporting the  
178 specificity of HIF1 $\alpha$  MO (Fig. 3B). However, HIF1 $\alpha$  KD does not affect *VEGF*, *VEGFR* and  
179 *BMP2/4* expression level at both times. Additionally, HIF1 $\alpha$  KD does not affect the spatial  
180 expression of *VEGF* in the two time points (Fig. 3C). Thus, our results indicate that the role of  
181 HIF1 $\alpha$  is restricted to dorsal ectoderm regulation, and does not interfere with skeletal patterning  
182 and VEGF regulation in the sea urchin embryo.

### 183 **Rationale of acute early and late hypoxia treatments**

184 We sought to study the effect of transient acute hypoxia on sea urchin skeletogenesis and gene  
185 expression under hypoxic conditions that are relevant to oxygen environmental levels. The  
186 sensitivity to hypoxia changes significantly between different species and for adult sea urchin the  
187 reported sub-lethal threshold for hypoxia is 1.22 mg/L O<sub>2</sub> (Sub-lethal threshold means that the  
188 animals survive this stress but their growth, reproduction and physiology are damaged (Vaquer-  
189 Sunyer and Duarte, 2008)). Water-quality surveys on sites where a massive mortality event  
190 occurred, detected levels of 0.5mg/L O<sub>2</sub> and below in the seabed in depth of 10 meters and under  
191 (Altieri et al., 2017). We therefore studied the effect of growth in 0.4-0.5 mg/L O<sub>2</sub>, which is severe  
192 hypoxic conditions, at 18°C, that is the typical temperature for the upper water column in the  
193 Mediterranean sea (Mavropoulou A.M, 2020).

194 We specifically wanted to distinguish between the effect of hypoxia applied during the formation  
195 of the DV axis and hypoxia applied after the DV axis is established (Duboc et al., 2004; Lapraz et  
196 al., 2009; Nam et al., 2007; Range et al., 2007). Starting at the early blastula, the expression of  
197 Nodal, is maintained by an auto-regulation, where Nodal signaling activates the expression of the  
198 *nodal* gene (Duboc et al., 2004; Lapraz et al., 2009; Nam et al., 2007; Range et al., 2007). This  
199 could indicate that this later phase of development is less sensitive to exogenous hypoxia (Fig. 1B).

200 Early blastula occurs in *P. lividus* embryos under normal conditions at about 10hpf (Duboc et al.,  
201 2004; Lapraz et al., 2009), but when the embryos are grown in hypoxic conditions their  
202 development is slower and they reach this stage at 16hpf. We therefore studied the effect of growth  
203 in hypoxic conditions (0.4-0.5 mg/L O<sub>2</sub>) for 16 hours, from fertilization and on (early hypoxia,  
204 Figs. 4-5), and from early blastula stage and on (late hypoxia, Fig. 6). We observed significant  
205 differences in the skeletogenic phenotypes and in gene expression between these two treatments  
206 (see methods for the exact protocol).

### 207 **Early hypoxia distorts skeletal patterning and expands ventral and skeletal gene expression**

208 Embryos grown for 16hpf in hypoxic conditions applied immediately from fertilization and on  
209 (early hypoxia), are viable and develop into a normally looking blastula, but show severe DV axis  
210 disruption and skeletogenic defects from the gastrula stage and on (Fig. 4A-G). This is in agreement  
211 with previous works on *S. purpuratus* and indicates that the effect of hypoxic conditions is not  
212 species specific (Agca et al., 2009; Chang et al., 2017; Coffman et al., 2009; Coffman et al., 2004;  
213 Coffman et al., 2014). At gastrula stage, most of the embryos grown in early hypoxia show irregular  
214 skeleton with several ectopic spicules (61%, Fig. 4B, C, G). At pluteus stage, the embryos show  
215 partial recovery and display two major skeletogenic phenotypes: A strong phenotype where the  
216 skeleton is radialized, the DV axis is disrupted and multiple ectopic spicules are observed (24%,  
217 Fig. 4F, G) and a weaker phenotype where the DV axis seems normal but the skeleton shows  
218 ectopic spicule branching (41%, Fig. 4E, G). The rest of the embryos developed normally. The  
219 skeletogenic phenotypes indicate that hypoxic conditions can strongly affect skeletal patterning  
220 probably through changes in skeletogenic gene expression.

221 Next, we investigated the effect of hypoxia on the expression of the DV patterning genes, *nodal*,  
222 *BMP2/4* and *chordin*, at blastula and gastrula stages in *P. lividus*. Growth in hypoxic conditions  
223 significantly expands *nodal* spatial expression throughout the ectoderm at blastula stage, compared  
224 to the ventral localized expression of this gene in normal development (Fig. 4H), in agreement with  
225 previous studies in *S. purpuratus* (Coffman et al., 2014). The spatial expression of *BMP2/4* and  
226 *chordin* show similar expansion at this time, as expected from downstream target genes of Nodal  
227 signaling (Fig. 4I, J). At early gastrula stage, the expression of *nodal* and *BMP2/4* is expanded in  
228 embryos grown in hypoxic conditions compared to the expression of these genes in embryos grown  
229 in normoxic conditions (Fig. 4K, L). However, the expansion at gastrula stage is not throughout  
230 the ectoderm like in the blastula stage, but seems more localized to about a half of the ectoderm, in  
231 agreement with the partial phenotypic recovery at the pluteus stage (Fig. 4G).



232 These results suggest that hypoxia leads to the expansion of the ventral ectoderm and probably to  
233 the decrease in the dorsal ectoderm domain, which may affect the expression of key skeletogenic  
234 regulators, such as *VEGF* and *VEGFR*. Indeed, growth in hypoxic conditions shifts and expands  
235 the spatial expression of *VEGF* to one side of the ectoderm, which is most likely the dorsal ectoderm  
236 (Fig. 4M). In addition, the expression of *VEGFR* expands beyond the two lateral skeletogenic cell  
237 clusters in which it is normally localized (Fig. 4N). Furthermore, the *VEGFR* expressing cells  
238 demonstrate the perturbed migration of the skeletogenic cells in hypoxic embryos. This phenotype  
239 could be due to the expanded expression of the VEGF ligand that directs the migration of the  
240 skeletogenic cells in normal embryos. In sum, growth in hypoxic conditions perturbs the spatial  
241 organization of the skeletogenic cells and expands the ectodermal expression of *Nodal*, *BMP2/4*,  
242 *chordin* and *VEGF* and the skeletogenic expression of *VEGFR*.

### 243 **Early hypoxia reduces BMP activity which explains *VEGF* and *VEGFR* expansion**

244 The expansion of the ventral side in hypoxic conditions suggests that BMP activity at the dorsal  
245 side might be reduced, and the reduction of the repressing BMP activity could explain *VEGF* and  
246 *VEGFR* expansion to the dorsal side. To test this hypothesis and monitor BMP activity in normal  
247 vs. hypoxic conditions, we performed immunostaining against pSMAD1/5/8. We studied  
248 pSMAD1/5/8 signal at two different developmental stages; mesenchyme blastula, when BMP  
249 activity is localized at the dorsal ectoderm (Fig. 5A), and at late gastrula, when BMP activity is  
250 localized at the dorsal skeletogenic cells (Fig. 5C). Hypoxic conditions completely abolish  
251 pSMAD1/5/8 signal from the nuclei of the dorsal ectodermal cells at mesenchyme blastula stage  
252 (Fig. 5B). At late gastrula stage, hypoxic conditions eliminate the pSMAD1/5/8 signal from the  
253 dorsal skeletogenic cells (Fig. 5D), or strongly reduce it (Fig. 5E). These results indicate, that  
254 despite *BMP2/4* expansion in hypoxic embryos, its activity is reduced during hypoxia. The reduced  
255 activity can be explained by the expansion of BMP antagonist, Chordin, during hypoxic conditions  
256 (Fig. 5C). Together, these results show that BMP activity in the dorsal ectoderm and in the dorsal  
257 skeletogenic cells is reduced in hypoxic conditions. Apparently, the reduction of BMP activity  
258 removes the repression of *VEGF* and *VEGFR* at the dorsal embryonic domains, leads to their  
259 expansion to this domain and to the disruption of skeletal patterning.

### 260 **Late hypoxia mildly affects skeletogenesis and doesn't affect DV and skeletal regulatory genes**

261 Our studies show that early hypoxia strongly affects the spatial activity of the main regulators of  
262 DV axis formation, *Nodal* and *BMP2/4*, and the perturbation of these factors affects skeletal  
263 patterning and *VEGF*, *VEGFR* and *SM30* expression. Next, we wanted to test whether hypoxia  
264 affects skeletogenesis after the DV axis is formed and to investigate the effect of late hypoxic

265 conditions on regulatory gene expression. Thus, we studied the skeletogenic phenotypes of hypoxia  
266 applied between 10hpf and 26hpf, which is after the DV axis is established, as explained above.  
267 Embryos grown in late hypoxia showed a delayed development and at 26hpf were equivalent to  
268 early gastrula stage in normoxic embryos (Fig. 6A, B). At late gastrula and pluteus stages, almost  
269 all the embryos grown in late hypoxia show normal skeletal patterning with the two spicules  
270 correctly positioned at the two lateral sides (Fig. 6C-G). More than half of the embryos grown in  
271 late hypoxia developed ectopic skeletal branching in these two stages, and at pluteus stage, about  
272 2% of the embryos show radialized skeleton with ectopic spicules. Overall, late hypoxia induces  
273 skeletal defects, such as ectopic branching, but it hardly affects skeletal patterning.

274 We next studied the effect of late hypoxic conditions on the expression of the key regulatory genes  
275 investigated above. Late hypoxia treatment does not affect the spatial expression of *nodal* (Fig.  
276 6H), in agreement with the normal formation of the DV axis and normal skeletal patterning in this  
277 condition. Furthermore, late hypoxia does not affect the spatial expression pattern of *BMP2/4*,  
278 *VEGF* and *VEGFR* genes, so these genes are probably not the mediators of the observed mild  
279 skeletal defects (Fig. 6I-K). Thus, after the DV axis forms, the expression of the upstream  
280 patterning and skeletogenesis regulators, *nodal*, *BMP2/4*, *VEGF* and *VEGFR* is not affected by  
281 hypoxic conditions and the skeletal patterning is overall normal.

## 282 **Discussion**

283 GRNs are the genomically encoded programs that control embryonic development, but the  
284 environmental conditions in which these GRNs operate can significantly affect their outcome  
285 (Beldade et al., 2011; Smith et al., 2018). Particularly, the use of hypoxia and redox gradients to  
286 control developmental processes in various phyla, might make the embryos more sensitive to low  
287 oxygen levels that are becoming more common in the ocean (Comperolle et al., 2003; Cordeiro  
288 and Tanaka, 2020; Dunwoodie, 2009; Semenza, 2012). The structure of the developmental GRN  
289 defines its function during environmental hypoxia and underlies the response and resilience to  
290 hypoxia during embryogenesis. Here we studied the regulatory linkages and response to transient  
291 acute hypoxia of the GRNs that control DV patterning and skeletogenesis in the sea urchin embryo  
292 (Fig. 7A, B). We discovered that hypoxia applied during the time where a redox gradient guides  
293 the DV axis formation results with a major disruption of the spatial expression of key regulatory  
294 genes which explains the radial skeleton formation in these embryos. However, once the DV axis  
295 is established, these regulatory genes are no longer affected by hypoxic conditions and skeletal  
296 patterning is largely normal. While this suggests that embryos could overcome transient hypoxia if  
297 it occurs after their DV axis is formed, hypoxic conditions in natural habitats can last for days and

298 weeks, which is much more than the embryos can tolerate (Altieri et al., 2017). Below we discuss  
299 our main findings and their possible implications.

300 Our findings illuminate the regulatory interactions between the DV and skeletogenic GRNs that  
301 underlie skeletal patterning in the sea urchin embryo. Previous studies had shown that *VEGF*  
302 expression is restricted from the ventral ectoderm by Nodal's target, *Not1* (Li et al., 2012), but the  
303 mechanism that excludes *VEGF* expression from the dorsal ectoderm was not known. Here we  
304 show that BMP activity excludes both *VEGF* from the dorsal ectoderm and *VEGFR* and *SM30* from  
305 the dorsal skeletogenic cells, and this exclusion is necessary for spicule initiation to occur only in  
306 the ventro-lateral skeletogenic clusters (Fig. 2). We also show that *HIF1 $\alpha$* , a key activator of VEGF  
307 in vertebrates' vascularization (Dunwoodie, 2009; Pagès and Pouysségur, 2005) does not regulate  
308 VEGF signaling during early sea urchin development (Fig. 3, 7A). Apparently, the regulatory  
309 function of this factor in normal sea urchin development is limited to shaping *nodal* expression  
310 domain in the early blastula (Chang et al., 2017), and to activating early dorsal gene expression  
311 (Ben-Tabou de-Leon et al., 2013). Thus, BMP signaling restricts VEGF activity to the ventro-  
312 lateral skeletogenic clusters and this restriction is required for the exclusion of spicule formation  
313 from the dorsal skeletogenic cells in normal sea urchin embryos (Fig. 7A).

314 Early hypoxia in sea urchin embryos strongly distorts the spatial expression of DV and skeletogenic  
315 patterning genes, which leads to the formation of ectopic spicules and embryo radialization (Fig.  
316 4, 7B). Previous studies have shown that hypoxic embryos are ventralized (Agca et al., 2009) and  
317 that *nodal* expression expands in hypoxic conditions (Coffman et al., 2014). Here we revealed the  
318 cascade of regulatory interactions that underlie embryo ventralization and the formation of ectopic  
319 spicules. Early hypoxia leads to the expansion of *nodal* to the dorsal side, which leads to the  
320 expansion of its targets, *BMP2/4* and *chordin* in this condition (Fig. 4H-L, Fig. 7B). The activity  
321 of BMP signaling is significantly reduced in both the dorsal ectoderm and dorsal skeletogenic cells  
322 as evident from pSMAD1/5/8 staining (Fig. 5). This reduction is probably due to the expansion of  
323 the expression of BMP antagonist, *chordin*, into the dorsal side, which blocks BMP activity in early  
324 hypoxia embryos (Fig. 4J, 7B). These changes in the spatial activity of Nodal and BMP signaling  
325 drive the shift and expansion of *VEGF* and *VEGFR* expression to the dorsal ectoderm and dorsal  
326 skeletogenic cells, respectively (Fig. 4M, N 7B). The expansion of VEGF activity to the dorsal  
327 skeletogenic cells explains the formation of ectopic spicules in the dorsal side in early hypoxic  
328 condition (Fig. 7B). Hence, early hypoxia expands *nodal* expression which reduces BMP activity  
329 and specifically, removes the dorsal repression of VEGF signaling, which leads to the formation of  
330 ectopic spicules in the dorsal side.

331 In striking difference to the strong effect of early hypoxia on the expression of DV and skeletogenic  
332 regulatory genes, hypoxia applied after the DV axis is established does not affect the expression of  
333 these genes and results with overall normal skeletogenic patterning (Fig. 6). This resilience of the  
334 DV GRN to late hypoxia can be explained by the structure of the GRN, that includes positive and  
335 negative feedback loops that restrain Nodal activity (Fig. 7A,B, (Duboc et al., 2008; Nam et al.,  
336 2007; Range et al., 2007)). At the early blastula stage, *nodal* expression is maintained by the Nodal  
337 pathway through the transcription factor SMAD2/3 (Nam et al., 2007; Range et al., 2007), and  
338 *nodal* spatial expression is restricted by its antagonist, Lefty, that is also activated by the Nodal  
339 pathway (Fig. 7A, (Duboc et al., 2008)). Once the spatial domain of Nodal activity is established  
340 and stabilized by the Nodal-Lefty feedback loops, it is not disrupted by hypoxic conditions,  
341 indicating that the redox state is no longer a factor in *nodal* regulation at this stage (Fig. 6H). Nodal  
342 spatial activity defines the domain of BMP activity through the Nodal-BMP2/4-Chordin incoherent  
343 feedforward loop, which restricts VEGF activity that leads to normal skeletogenic patterning, in  
344 late hypoxia embryos (Figs. 6, 7A). This structure of the DV GRN could also underlie the relative  
345 restriction of *nodal* expression at the gastrula stage compared to its broad expression at the blastula  
346 stage (Fig. 4H, K) and the partial recovery of skeletal patterning in the pluteus stage in early  
347 hypoxia (Fig. 4G). Overall, the structure of the DV GRN enables it to partially recover the effect  
348 of early hypoxia at later developmental stages and makes it resilient to hypoxia applied after the  
349 DV axis had formed.

350 While the effect of the hypoxic conditions on the regulatory cascade downstream of Nodal  
351 signaling is quite clear from our findings, the cause of nodal expansion in early hypoxia requires  
352 further investigation. Early hypoxia was shown to expand the expression of the HIF1 $\alpha$  protein that  
353 is normally localized at the dorsal side (Chang et al., 2017). HIF1 $\alpha$  transiently represses early *nodal*  
354 expression (Chang et al., 2017), yet, HIF1 $\alpha$  expansion does not restrict *nodal* expression that  
355 expands dorsally in early hypoxia (Fig. 4). Hypoxia was shown to increase ROS levels in cancer  
356 cells, smooth muscle cells and endothelial cells, apparently due to its effect on the mitochondria  
357 electron transport chain (Chi et al., 2010; Desireddi et al., 2010; Fuhrmann and Brune, 2017;  
358 Medini et al., 2020; Tafani et al., 2016). If hypoxia affects the mitochondria in the sea urchin  
359 embryo and further increases the ROS levels at the already oxidizing side (Fig. 1), this could  
360 underlie the expansion of *nodal* expression in early hypoxia. Thus, *nodal* expansion could be the  
361 result of the change in the redox state in hypoxic conditions and the effect of this change on the  
362 redox sensitive transcription factors that control *nodal* expression (Agca et al., 2009; Coffman et  
363 al., 2004; Coffman et al., 2014; Range et al., 2007). Future research will hopefully illuminate this  
364 intriguing regulatory mechanism.

365 Our findings illuminate some similarities between the GRNs that pattern the DV axis and  
366 skeletogenesis in the sea urchin embryo and the upstream regulation of vertebrate's vascularization  
367 (Lee et al., 2009; Ushio-Fukai and Nakamura, 2008). Hypoxia and redox gradients that regulate  
368 DV axis formation and skeletal patterning in the sea urchin embryo, were shown to induce  
369 angiogenesis in vertebrates during normal development and in cancer (Chi et al., 2010; Potente et  
370 al., 2011). The regulatory interactions between BMP and VEGF that are essential for sea urchin  
371 skeletal patterning, also control vertebrates' vascularization, however, they are rather complex:  
372 BMP activates VEGF and induces vascularization in some tissues, while it represses VEGF in other  
373 tissues (Bai et al., 2013; Dyer et al., 2014; Garcia de Vinuesa et al., 2016; He and Chen, 2005;  
374 Wiley et al., 2011). The Nodal pathway does not participate in hypoxia induced vascularization  
375 during normal development in vertebrates, however, in various cancer cells, hypoxia drives Nodal  
376 expression, which then promotes *VEGF* expression and angiogenesis (Fig. 7C, (Hueng et al., 2011;  
377 Quail et al., 2011; Quail et al., 2012)). The transcription factor HIF1 $\alpha$  is a key activator of VEGF  
378 expression and angiogenesis in vertebrates, but the sea urchin HIF1 $\alpha$  does not regulate VEGF  
379 signaling during normal development. Sea urchin HIF1 $\alpha$  activity is limited to the transient  
380 inhibition of *nodal* and the early activation of dorsal genes (Fig. 3, 7) (Ben-Tabou de-Leon et al.,  
381 2013; Chang et al., 2017). Overall, regulatory interactions between Nodal, BMP, HIF1 and VEGF  
382 pathways and their modulation by hypoxic conditions are observed both during DV and skeletal  
383 patterning in the sea urchin embryo and in vertebrates' vascularization, but there are some apparent  
384 differences in the linkages. The participation of these common pathways together with the  
385 similarity between the skeletogenic and the vascularization GRNs (Morgulis et al., 2019; Oliveri  
386 et al., 2008) might indicate that these upstream patterning programs diverged from a common  
387 ancestral GRN; yet we cannot exclude convergent evolution at this stage.

388 Our findings have implications on the effect of ocean deoxygenation on embryos that use hypoxia  
389 and redox signaling in their development, yet, the major differences between lab experiments and  
390 field conditions should be considered. Our analyses and previous studies suggest that the use of  
391 hypoxia and redox gradients makes the sea urchin GRNs highly sensitive to acute hypoxia applied  
392 in its early developmental stages, but the GRNs are less sensitive to hypoxia applied after the  
393 establishment of the DV axis. Yet, hypoxia events in the ocean and in the coastal zones can last for  
394 weeks and their lethal effect is observed for months after (Altieri et al., 2017; Hughes et al., 2020).  
395 So even if the sea urchin embryos can survive 16 hours of hypoxia, they will probably die in longer  
396 periods of low oxygen. Furthermore, in other organisms ROS and hypoxia signaling regulate  
397 multiple developmental processes and in some cases, these processes last throughout

398 embryogenesis, which could make the embryos of these organisms even more sensitive to hypoxia  
399 than sea urchin embryos (Breus and Dickmeis, 2020; Coffman and Su, 2019; Cordeiro and Tanaka,  
400 2020). Within these alarming notions, lab experiments can show distinct and even opposing trends  
401 then experiments that are done in the field due to the increased and unexpected complexity of  
402 natural sites (Foo et al., 2020). Therefore, further hypoxia studies guided by environmental changes  
403 should be done in the field, to elucidate the sensitivity and resilience of the molecular response to  
404 hypoxia in marine embryos in their natural habitat.

## 405 **Materials and Methods**

### 406 **Animals and embryo cultures**

407 Adult *P. lividus* sea urchins were purchased from the Institute of Oceanographic and Limnological  
408 Research (IOLR) in Eilat, Israel. Eggs and sperm were obtained by injection 0.5M KCl solution to  
409 adult sea urchins. Embryos were cultured in artificial seawater (ASW) at 18°C.

### 410 **Microinjection, RNA extraction and Reverse-transcription**

411 The design and preparation of novel morpholino (MO) was done in genetools (<http://www.genetools.com>).  
412 Translation of *HIF1α* was blocked by the microinjection of 400-700μM *HIF1α*-MO  
413 into sea urchin eggs. *HIF1α*-MO sequence: 5`-GGTCGCCATAATCAGTCTCTGTTTC-3`.  
414 Translation of *BMP2/4* was blocked by the microinjection of 400-600μM. *BMP2/4*-MO sequence:  
415 5`-GACCCAGTTTGAGGTGGTAACCAT-3`, this MO has been characterized in previous studies  
416 (Duboc et al., 2004). The control MO is Random commercial MO which does not have any effect  
417 on embryo development, along with 1μg/ml rhodamine dextran (D3329 Molecular probes, OR,  
418 USA) and 0.12M KCl. Total RNA was extracted from injected sea urchin embryos (≥120 injected  
419 embryos) using RNeasy Micro Kit (50) from QIAGEN (#74004) according to the kit protocol using  
420 DNase treatment from RNease-Free DNase Set- Qiagen (50) (#79254). Elution was done in 16.5μl  
421 nuclease-free ultra-pure water. Extracted RNAs were then reverse transcribed into cDNA by using  
422 SuperScript™ II Reverse Transcriptase (Thermo Fisher scientific 18064022) (10 min 25°C, 2hr in  
423 25°C, 85°C for 5 min).

### 424 **Quantitative-PCR (qPCR) analysis**

425 qPCR was performed using the CFX384 Touch™ Real-Time PCR Detection System #1855485.  
426 Reactions were carried out in 10μl volume including: 5μl SYBR BioRad IQ SYBR Green Supermix  
427 (#1725125), 2.5μl of 1.2μM forward and reverse gene specific primers and 2.5μl of cDNA (qPCR  
428 primers used in this study are listed in Table S1). Each cDNA sample was run in triplicate, for  
429 every candidate gene, ubiquitin was used as internal control. The reactions thermal profile was:

430 95°C for 3 minutes followed by 40 amplification cycles of 95°C for 10 seconds and 55°C for 30  
431 sec. Dissociation analysis was performed at the end of each reaction to confirm the amplification  
432 specificity. Primer sets for all tested genes were designed using Primer3Plus  
433 (<http://www.bioinformatics.nl/cgi-bin/primer3plus/primer3plus.cgi/>). Results are presented as the  
434 means and standard error of at least two biological replicates. The comparison to an internal  
435 standard (ubiquitin) was done in order to determine the expression level of the gene, and the change  
436 in the expression levels were measured in comparison to the expression level of the gene in control  
437 MO.

#### 438 **Hypoxia treatment**

439 ASW were treated with 99.5% Nitrogen (N<sub>2</sub>) and 0.5% Oxygen (O<sub>2</sub>) to decrease the oxygen  
440 solubility in ASW till the dissolved O<sub>2</sub> level was 0.4-0.5 mg/L, creating hypoxic ASW. Embryos  
441 were transferred into petri-dish that contains the hypoxic ASW, then the dishes were incubated in  
442 a hypoxia chamber at 18°C. The hypoxia chamber is a sealed box that receives a constant flow of  
443 99.5% N<sub>2</sub> and 0.5% O<sub>2</sub>. To distinguish between the direct effect that hypoxic conditions might have  
444 on skeletogenesis and its effect on DV patterning, we studied the skeletogenic phenotypes of  
445 hypoxia applied immediately after fertilization (early hypoxic condition) and the effect of hypoxia  
446 applied after the DV axis was established (late hypoxic condition). In early hypoxia treatment, the  
447 eggs were fertilized, their fertilization envelope was immediately removed and the zygotes were  
448 incubated in the hypoxia chamber for 16 hours. In late hypoxia treatment, the eggs were fertilized  
449 and the embryos were cultured under normoxic conditions for 10 hours until the blastula stage.  
450 Then, the embryos were transferred into the hypoxia chamber and incubated in hypoxic conditions  
451 for 16 hours. After 16 hours in hypoxic conditions the embryos were removed from the hypoxia  
452 chamber and cultured in normoxic conditions until the pluteus stage.

#### 453 **Probe design and WMISH procedure**

454 WMISH probe preparation and WMISH procedure were performed as described in (Morgulis et  
455 al., 2019). Primer list is provided in table S2.

#### 456 **Removal of fertilization envelope**

457 To perform WMISH on sea urchin embryos at early blastula stage, the fertilization envelope were  
458 removed; Fertilized eggs were incubated in presence of Paraminobenzoic acid (PABA, A6928,  
459 Sigma) and Amino triazole (ATA, A8056 Sigma) (2mM each at final concentration) to soften the  
460 fertilization envelope (FE). After microscopy visualization of FE, FE were removed by flow the

461 zygotes through a 75 $\mu$ m mesh four times. Next, the embryos were washed three times with ASW  
462 and grown till the indicated collection time points.

### 463 **Immunostaining**

464 Immunostaining of pSMAD1/5/8 antibody was done similarly to (Lapraz et al., 2009) with minor  
465 modifications. Embryos were fixed in 4% paraformaldehyde, 33mM Maleic acid buffer pH7,  
466 166mM NaCl, for 10 minutes at room temperature, then embryos exposed to Methanol for 1  
467 minute. Embryos were washed four times with PBST, then incubation for 1 hour in blocking  
468 solution (PBST and 4% sheep serum), followed by incubation with primary Antibody against  
469 pSMAD1/5/8 (the antibody was purchased from Cell Signaling Technology; no. 9511) at 1:200  
470 dilution in blocking solution, overnight at 4°C. Embryos were then washed four time in PBST, then  
471 the secondary Antibody was added to the embryos (Peroxidase-conjugated AffiniPure Goat Anti-  
472 Rabbit IgG; no. 111-035-003) diluted 1:200 in blocking solution and incubated for 1 hour in room  
473 temperature, followed by four washes with PBST. Store solution (PBST in 50% glycerol) at 4°C.

### 474 **Imaging**

475 All images presented in this study were generated on a Zeiss Axio Imager M2.

### 476 **Acknowledgments**

477 We thank Imad Shams for generously providing the hypoxic chamber and gas controller; Eli  
478 shemesh for providing the oxygen sensor; Shlomo Ben-Tabou de-Leon for technical assistance  
479 with the hypoxic system build-up; David Ben-Ezra for his help with sea urchin handling; Miri  
480 Morgulis for helpful comments and suggestions. This work was supported by the Israel Science  
481 Foundation Grants 41/14 and 211/20 (to Smadar Ben-Tabou de-Leon).

482

### 483 **References**

- 484 Adomako-Ankomah, A., Ettensohn, C.A., 2013. Growth factor-mediated mesodermal  
485 cell guidance and skeletogenesis during sea urchin gastrulation. *Development* 140, 4214-  
486 4225.
- 487 Agca, C., Klein, W.H., Venuti, J.M., 2009. Reduced O<sub>2</sub> and elevated ROS in sea urchin  
488 embryos leads to defects in ectoderm differentiation. *Dev Dyn* 238, 1777-1787.
- 489 Altieri, A.H., Harrison, S.B., Seemann, J., Collin, R., Diaz, R.J., Knowlton, N., 2017.  
490 Tropical dead zones and mass mortalities on coral reefs. *Proc Natl Acad Sci U S A* 114,  
491 3660-3665.
- 492 Bai, Y., Wang, J., Morikawa, Y., Bonilla-Claudio, M., Klysik, E., Martin, J.F., 2013.  
493 Bmp signaling represses Vegfa to promote outflow tract cushion development.  
494 *Development* 140, 3395-3402.



- 495 Beldade, P., Mateus, A.R.A., Keller, R.A., 2011. Evolution and molecular mechanisms of  
496 adaptive developmental plasticity. *Molecular Ecology* 20, 1347-1363.
- 497 Ben-Tabou de-Leon, S., Su, Y.H., Lin, K.T., Li, E., Davidson, E.H., 2013. Gene  
498 regulatory control in the sea urchin aboral ectoderm: spatial initiation, signaling inputs,  
499 and cell fate lockdown. *Dev Biol* 374, 245-254.
- 500 Breitburg, D., Levin, L.A., Oschlies, A., Gregoire, M., Chavez, F.P., Conley, D.J.,  
501 Garcon, V., Gilbert, D., Gutierrez, D., Isensee, K., Jacinto, G.S., Limburg, K.E., Montes,  
502 I., Naqvi, S.W.A., Pitcher, G.C., Rabalais, N.N., Roman, M.R., Rose, K.A., Seibel, B.A.,  
503 Telszewski, M., Yasuhara, M., Zhang, J., 2018. Declining oxygen in the global ocean and  
504 coastal waters. *Science* 359.
- 505 Breus, O., Dickmeis, T., 2020. Genetically encoded thiol redox-sensors in the zebrafish  
506 model: lessons for embryonic development and regeneration. *Biol Chem*.
- 507 Carmeliet, P., 2005. VEGF as a key mediator of angiogenesis in cancer. *Oncology* 69  
508 Suppl 3, 4-10.
- 509 Chang, W.L., Chang, Y.C., Lin, K.T., Li, H.R., Pai, C.Y., Chen, J.H., Su, Y.H., 2017.  
510 Asymmetric distribution of hypoxia-inducible factor alpha regulates dorsoventral axis in  
511 the early sea urchin embryo. *Development* 144, 2940-2950.
- 512 Chi, A.Y., Waypa, G.B., Mungai, P.T., Schumacker, P.T., 2010. Prolonged hypoxia  
513 increases ROS signaling and RhoA activation in pulmonary artery smooth muscle and  
514 endothelial cells. *Antioxid Redox Signal* 12, 603-610.
- 515 Coffman, J.A., Coluccio, A., Planchart, A., Robertson, A.J., 2009. Oral-aboral axis  
516 specification in the sea urchin embryo III. Role of mitochondrial redox signaling via  
517 H<sub>2</sub>O<sub>2</sub>. *Dev Biol* 330, 123-130.
- 518 Coffman, J.A., Davidson, E.H., 2001. Oral-aboral axis specification in the sea urchin  
519 embryo. I. Axis entrainment by respiratory asymmetry. *Dev Biol* 230, 18-28.
- 520 Coffman, J.A., McCarthy, J.J., Dickey-Sims, C., Robertson, A.J., 2004. Oral-aboral axis  
521 specification in the sea urchin embryo: II. Mitochondrial distribution and redox state  
522 contribute to establishing polarity in *Strongylocentrotus purpuratus*. *Dev Biol* 273, 160-  
523 171.
- 524 Coffman, J.A., Su, Y.H., 2019. Redox regulation of development and regeneration. *Curr*  
525 *Opin Genet Dev* 57, 9-15.
- 526 Coffman, J.A., Wessels, A., DeSchiffart, C., Rydlizky, K., 2014. Oral-aboral axis  
527 specification in the sea urchin embryo, IV: hypoxia radializes embryos by preventing the  
528 initial spatialization of nodal activity. *Dev Biol* 386, 302-307.
- 529 Compennolle, V., Brusselmans, K., Franco, D., Moorman, A., Dewerchin, M., Collen, D.,  
530 Carmeliet, P., 2003. *Cardia bifida*, defective heart development and abnormal neural crest  
531 migration in embryos lacking hypoxia-inducible factor-1alpha. *Cardiovasc Res* 60, 569-  
532 579.
- 533 Cordeiro, I.R., Tanaka, M., 2020. Environmental Oxygen is a Key Modulator of  
534 Development and Evolution: From Molecules to Ecology: Oxygen-sensitive pathways  
535 pattern the developing organism, linking genetic and environmental components during  
536 the evolution of new traits. *Bioessays* 42, e2000025.
- 537 Czihak, G., 1963. Entwicklungsphysiologische untersuchungen an echiniden. *Wilhelm*  
538 *Roux'Archiv für Entwicklungsmechanik der Organismen* 154, 272-292.

539 Desireddi, J.R., Farrow, K.N., Marks, J.D., Waypa, G.B., Schumacker, P.T., 2010.  
540 Hypoxia increases ROS signaling and cytosolic Ca(2+) in pulmonary artery smooth  
541 muscle cells of mouse lungs slices. *Antioxid Redox Signal* 12, 595-602.  
542 Duboc, V., Lapraz, F., Besnardeau, L., Lepage, T., 2008. Lefty acts as an essential  
543 modulator of Nodal activity during sea urchin oral-aboral axis formation. *Dev Biol* 320,  
544 49-59.  
545 Duboc, V., Lapraz, F., Saudemont, A., Bessodes, N., Mekpoh, F., Haillot, E., Quirin, M.,  
546 Lepage, T., 2010. Nodal and BMP2/4 pattern the mesoderm and endoderm during  
547 development of the sea urchin embryo. *Development* 137, 223-235.  
548 Duboc, V., Rottinger, E., Besnardeau, L., Lepage, T., 2004. Nodal and BMP2/4 signaling  
549 organizes the oral-aboral axis of the sea urchin embryo. *Dev Cell* 6, 397-410.  
550 Duloquin, L., Lhomond, G., Gache, C., 2007. Localized VEGF signaling from ectoderm  
551 to mesenchyme cells controls morphogenesis of the sea urchin embryo skeleton.  
552 *Development* 134, 2293-2302.  
553 Dunwoodie, S.L., 2009. The role of hypoxia in development of the Mammalian embryo.  
554 *Dev Cell* 17, 755-773.  
555 Dyer, L.A., Pi, X., Patterson, C., 2014. The role of BMPs in endothelial cell function and  
556 dysfunction. *Trends Endocrinol Metab* 25, 472-480.  
557 Foo, S.A., Koweek, D.A., Munari, M., Gambi, M.C., Byrne, M., Caldeira, K., 2020.  
558 Responses of sea urchin larvae to field and laboratory acidification. *Sci Total Environ*  
559 723, 138003.  
560 Fuhrmann, D.C., Brune, B., 2017. Mitochondrial composition and function under the  
561 control of hypoxia. *Redox Biol* 12, 208-215.  
562 Garcia de Vinuesa, A., Abdelilah-Seyfried, S., Knaus, P., Zwijsen, A., Bailly, S., 2016.  
563 BMP signaling in vascular biology and dysfunction. *Cytokine Growth Factor Rev* 27, 65-  
564 79.  
565 He, C., Chen, X., 2005. Transcription regulation of the vegf gene by the BMP/Smad  
566 pathway in the angioblast of zebrafish embryos. *Biochem Biophys Res Commun* 329,  
567 324-330.  
568 Hueng, D.-Y., Lin, G.-J., Huang, S.-H., Liu, L.-W., Ju, D.-T., Chen, Y.-W., Sytwu, H.-  
569 K., Chang, C., Huang, S.-M., Yeh, Y.-S., 2011. Inhibition of Nodal suppresses  
570 angiogenesis and growth of human gliomas. *Journal of neuro-oncology* 104, 21-31.  
571 Hughes, D.J., Alderdice, R., Cooney, C., Kühl, M., Pernice, M., Voolstra, C.R., Suggett,  
572 D.J., 2020. Coral reef survival under accelerating ocean deoxygenation. *Nature Climate*  
573 *Change* 10, 296-307.  
574 Lapraz, F., Besnardeau, L., Lepage, T., 2009. Patterning of the Dorsal-Ventral Axis in  
575 Echinoderms: Insights into the Evolution of the BMP-Chordin Signaling Network. *PLOS*  
576 *Biology* 7, e1000248.  
577 Lapraz, F., Röttinger, E., Duboc, V., Range, R., Duloquin, L., Walton, K., Wu, S.-Y.,  
578 Bradham, C., Loza, M.A., Hibino, T., Wilson, K., Poustka, A., McClay, D., Angerer, L.,  
579 Gache, C., Lepage, T., 2006. RTK and TGF- $\beta$  signaling pathways genes in the sea urchin  
580 genome. *Dev Biol* 300, 132-152.  
581 Lee, S.L., Rouhi, P., Dahl Jensen, L., Zhang, D., Ji, H., Hauptmann, G., Ingham, P., Cao,  
582 Y., 2009. Hypoxia-induced pathological angiogenesis mediates tumor cell dissemination,  
583 invasion, and metastasis in a zebrafish tumor model. *Proc Natl Acad Sci U S A* 106,  
584 19485-19490.

- 585 Lendahl, U., Lee, K.L., Yang, H., Poellinger, L., 2009. Generating specificity and  
586 diversity in the transcriptional response to hypoxia. *Nat Rev Genet* 10, 821-832.
- 587 Li, E., Materna, S.C., Davidson, E.H., 2012. Direct and indirect control of oral ectoderm  
588 regulatory gene expression by Nodal signaling in the sea urchin embryo. *Dev Biol* 369,  
589 377-385.
- 590 Low, N.H.N., Micheli, F., 2018. Lethal and functional thresholds of hypoxia in two key  
591 benthic grazers. *Marine Ecology Progress Series* 594, 165-173.
- 592 Luo, Y.J., Su, Y.H., 2012. Opposing nodal and BMP signals regulate left-right  
593 asymmetry in the sea urchin larva. *PLoS Biol* 10, e1001402.
- 594 Mavropoulou A.M, V.V., Sofianos S., 2020. Dissolved oxygen variability in the  
595 Mediterranean Sea. *J Mar Syst* 208, 103348.
- 596 Medini, H., Cohen, T., Mishmar, D., 2020. Mitochondria Are Fundamental for the  
597 Emergence of Metazoans: On Metabolism, Genomic Regulation, and the Birth of  
598 Complex Organisms. *Annu Rev Genet* 54, 151-166.
- 599 Morgulis, M., Gildor, T., Roopin, M., Sher, N., Malik, A., Lalzar, M., Dines, M., Ben-  
600 Tabou de-Leon, S., Khalaily, L., Ben-Tabou de-Leon, S., 2019. Possible cooption of a  
601 VEGF-driven tubulogenesis program for biomineralization in echinoderms. *Proceedings*  
602 *of the National Academy of Sciences* 116, 12353.
- 603 Nam, J., Su, Y.H., Lee, P.Y., Robertson, A.J., Coffman, J.A., Davidson, E.H., 2007. Cis-  
604 regulatory control of the nodal gene, initiator of the sea urchin oral ectoderm gene  
605 network. *Dev Biol* 306, 860-869.
- 606 Oliveri, P., Tu, Q., Davidson, E.H., 2008. Global regulatory logic for specification of an  
607 embryonic cell lineage. *Proc Natl Acad Sci U S A* 105, 5955-5962.
- 608 Pagès, G., Pouysségur, J., 2005. Transcriptional regulation of the Vascular Endothelial  
609 Growth Factor gene—a concert of activating factors\*. *Cardiovascular Research* 65, 564-  
610 573.
- 611 Pearse, J.S., 2006. Ecological role of purple sea urchins. *Science* 314, 940-941.
- 612 Peter, I.S., Davidson, E.H., 2011. A gene regulatory network controlling the embryonic  
613 specification of endoderm. *Nature* 474, 635-639.
- 614 Potente, M., Gerhardt, H., Carmeliet, P., 2011. Basic and therapeutic aspects of  
615 angiogenesis. *Cell* 146, 873-887.
- 616 Quail, D.F., Taylor, M.J., Walsh, L.A., Dieters-Castator, D., Das, P., Jewer, M., Zhang,  
617 G., Postovit, L.M., 2011. Low oxygen levels induce the expression of the embryonic  
618 morphogen Nodal. *Mol Biol Cell* 22, 4809-4821.
- 619 Quail, D.F., Walsh, L.A., Zhang, G., Findlay, S.D., Moreno, J., Fung, L., Ablack, A.,  
620 Lewis, J.D., Done, S.J., Hess, D.A., Postovit, L.-M., 2012. Embryonic Protein Nodal  
621 Promotes Breast Cancer Vascularization. *Cancer Research* 72, 3851.
- 622 Range, R., Lapraz, F., Quirin, M., Marro, S., Besnardeau, L., Lepage, T., 2007. Cis-  
623 regulatory analysis of nodal and maternal control of dorsal-ventral axis formation by  
624 Univin, a TGF-beta related to Vg1. *Development* 134, 3649-3664.
- 625 Schmidtko, S., Stramma, L., Visbeck, M., 2017. Decline in global oceanic oxygen  
626 content during the past five decades. *Nature* 542, 335-339.
- 627 Semenza, G.L., 2012. Hypoxia-inducible factors in physiology and medicine. *Cell* 148,  
628 399-408.

629 Sethi, A.J., Wikramanayake, R.M., Angerer, R.C., Range, R.C., Angerer, L.M., 2012.  
630 Sequential signaling crosstalk regulates endomesoderm segregation in sea urchin  
631 embryos. *Science* 335, 590-593.  
632 Smith, S.J., Rebeiz, M., Davidson, L., 2018. From pattern to process: studies at the  
633 interface of gene regulatory networks, morphogenesis, and evolution. *Current Opinion in*  
634 *Genetics & Development* 51, 103-110.  
635 Suh, S.S., Hwang, J., Park, M., Park, S.Y., Ryu, T.K., Lee, S., Lee, T.K., 2014. Hypoxia-  
636 modulated gene expression profiling in sea urchin (*Strongylocentrotus nudus*) immune  
637 cells. *Ecotoxicol Environ Saf* 109, 63-69.  
638 Sun, Z., Etensohn, C.A., 2014. Signal-dependent regulation of the sea urchin  
639 skeletogenic gene regulatory network. *Gene Expression Patterns* 16, 93-103.  
640 Tafani, M., Sansone, L., Limana, F., Arcangeli, T., De Santis, E., Polese, M., Fini, M.,  
641 Russo, M.A., 2016. The Interplay of Reactive Oxygen Species, Hypoxia, Inflammation,  
642 and Sirtuins in Cancer Initiation and Progression. *Oxid Med Cell Longev* 2016, 3907147.  
643 Tettamanti, G., Grimaldi, A., Valvassori, R., Rinaldi, L., de Eguileor, M., 2003. Vascular  
644 endothelial growth factor is involved in neoangiogenesis in *Hirudo medicinalis*  
645 (Annelida, Hirudinea). *Cytokine* 22, 168-179.  
646 Tiozzo, S., Voskoboynik, A., Brown, F.D., De Tomaso, A.W., 2008. A conserved role of  
647 the VEGF pathway in angiogenesis of an ectodermally-derived vasculature. *Dev Biol*  
648 315, 243-255.  
649 Ushio-Fukai, M., Nakamura, Y., 2008. Reactive oxygen species and angiogenesis:  
650 NADPH oxidase as target for cancer therapy. *Cancer Lett* 266, 37-52.  
651 Vaquer-Sunyer, R., Duarte, C.M., 2008. Thresholds of hypoxia for marine biodiversity.  
652 *Proc Natl Acad Sci U S A* 105, 15452-15457.  
653 Wiley, D.M., Kim, J.-D., Hao, J., Hong, C.C., Bautch, V.L., Jin, S.-W., 2011. Distinct  
654 signalling pathways regulate sprouting angiogenesis from the dorsal aorta and the axial  
655 vein. *Nature Cell Biology* 13, 686-692.  
656 Yoshida, M.A., Shigeno, S., Tsuneki, K., Furuya, H., 2010. Squid vascular endothelial  
657 growth factor receptor: a shared molecular signature in the convergent evolution of  
658 closed circulatory systems. *Evol Dev* 12, 25-33.  
659  
660  
661  
662  
663  
664  
665

666 **Figures legends**

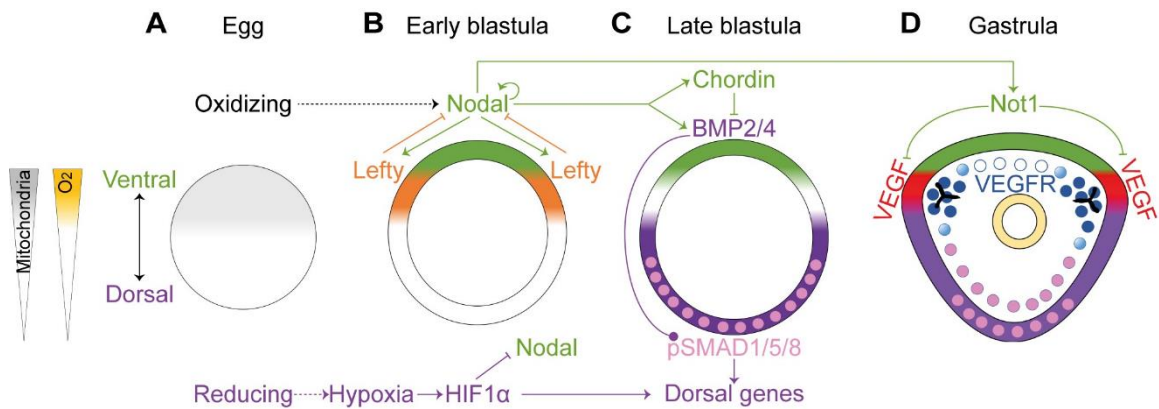

667

668 **Figure 1 The regulation of DV axis formation downstream of redox and oxygen gradients in**  
 669 **the sea urchin embryo.** Diagrams showing sea urchin DV and skeletal patterning in developing  
 670 sea urchin embryos in normal conditions based on (Chang et al., 2017; Coffman et al., 2009;  
 671 Coffman and Davidson, 2001; Coffman et al., 2004; Coffman et al., 2014; Czihak, 1963; Duboc et  
 672 al., 2004; Lapraz et al., 2009; Li et al., 2012). **(A)** The asymmetric distribution of mitochondria in  
 673 the egg induces a redox gradient. **(B)** Regulatory interactions between *nodal*, *lefty* and HIF1 $\alpha$  at the  
 674 early blastula stage. **(C)** Nodal regulation of BMP signaling in the late blastula stage. **(D)** In the  
 675 gastrula stage, Nodal activates the expression of Not1, that represses *VEGF* expression in the  
 676 ventral ectoderm. Throughout the figure, the ventral side and Nodal expression domain are  
 677 highlighted in green, the dorsal side and the domain of BMP activity are marked in purple. Nucleus  
 678 that show pSMAD1/5/8 are highlighted in pink. *VEGF* expression is marked in red. *VEGFR*  
 679 expression is marked in blue.

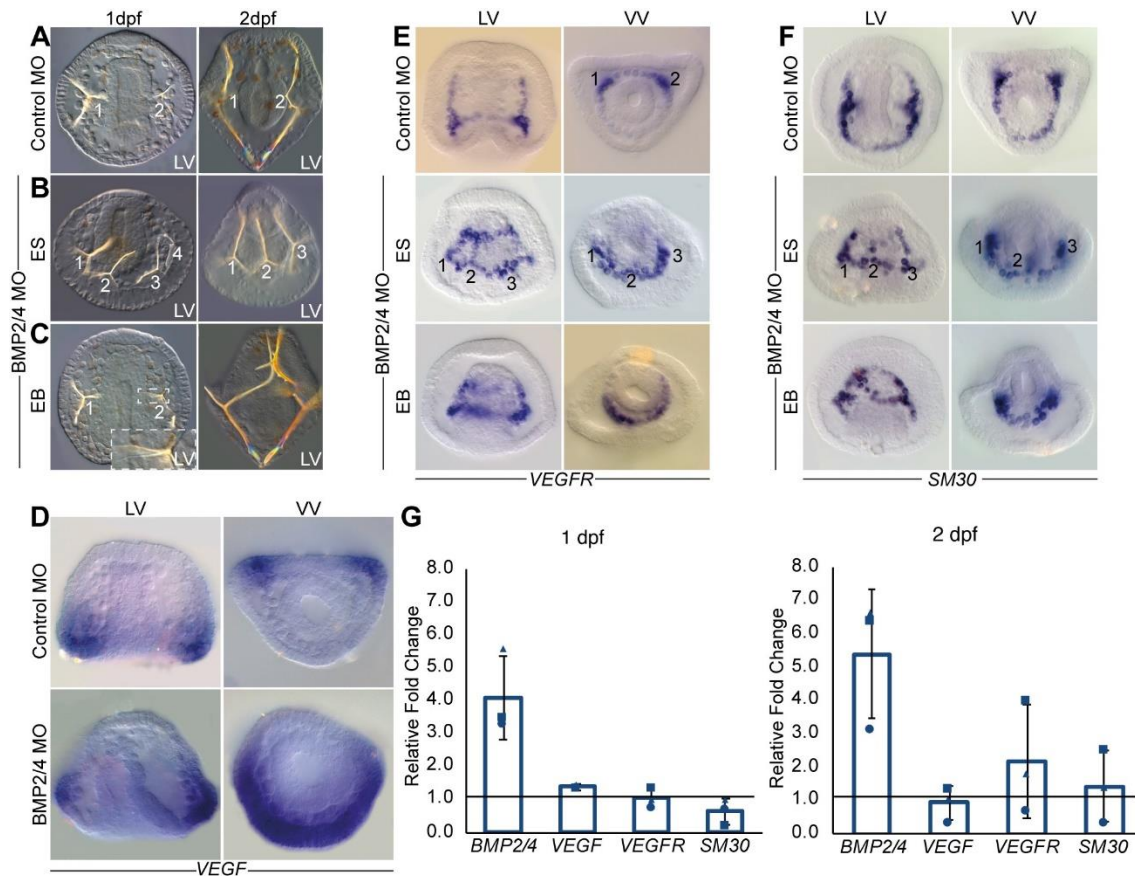

680

681 **Figure 2 BMP2/4 controls skeletal patterning and VEGF expression.** (A) Embryos injected  
682 with control MO show normal two spicules at 1dpf (left, 110/110 of scored embryos show this  
683 phenotype) and 2dpf (right, 56/56). (B-C) BMP2/4 MO injected embryos show either ectopic  
684 spicules indicated by numbers (ES, 89/169 1dpf, 120/135 2dpf) or ectopic spicule branching (EB,  
685 39/169 at 1dpf, 15/135 at 2dpf). (D) VEGF expression is localized in two lateral patches in control  
686 embryo (top) and is strongly expanded in embryos injected with BMP2/4 MO at 1dpf (bottom). (E-  
687 F) VEGFR and SM30 expression in control embryo (top) and in BMP2/4 morphants (middle and  
688 bottom) at 1dpf. BMP2/4 MO leads to the expansion of the expression either into ectopic skeletal  
689 cell-clusters indicated by numbers (ES) or to continuous expansion (EB). LV, lateral view, VV,  
690 ventral view. Phenotypes are based on  $n \geq 3$  independent biological replicates and spatial expression  
691 were observed in two independent biological replicates where  $n \geq 30$  embryos were scored in each  
692 condition. (G) Ratio between gene expression in BMP2/4 MO compared to control MO embryos  
693 at 1dpf (left graph) and 2dpf (right graph). Bars show averages and markers indicate individual  
694 measurements of three independent biological replicates. Line marks ratio of 1 that indicates that  
695 the expression of the gene is unaffected by the perturbation. Error bars indicate standard deviation.

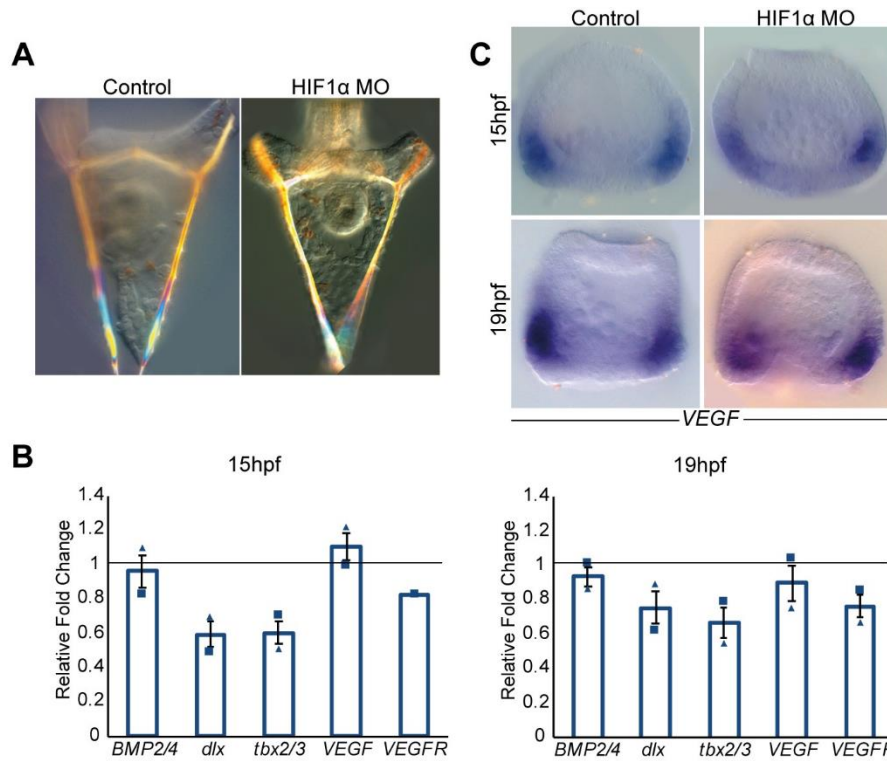

696

697

698

699

700

701

702

703

704

705

**Figure 3 Sea urchin HIF1 $\alpha$  does not affect skeletal patterning and VEGF expression.** (A) Control (left) and HIF1 $\alpha$  MO injected embryos (right) show comparable skeletal structure at 2dpf. (B) Ratio between gene expression in HIF1 $\alpha$  MO compared to control MO embryos at 15hpf (left graph) and 19hpf (right graph). Bars show averages and markers indicate individual measurements of two independent biological replicates. Line marks ratio of 1 that indicates that the expression of the gene is unaffected by the perturbation. Error bars indicate standard deviation. (C) VEGF expression is similar in embryos injected with control MO (left) and HIF1 $\alpha$  MO (right) at 15hpf (top) and 19hpf (bottom). Spatial expression were observed in two independent biological replicates where  $n \geq 30$  embryos were scored in each condition.

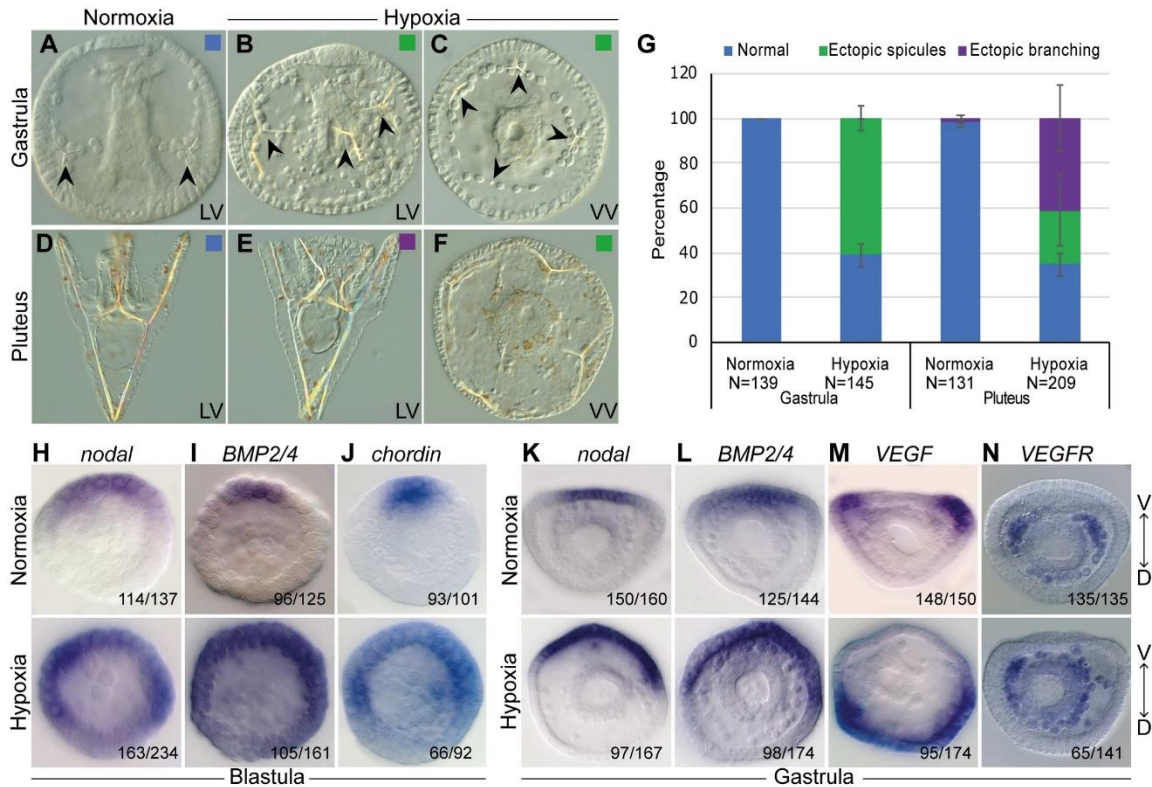

706

707

708

709

710

711

712

713

714

715

716

717

718

719

720

721

722

**Figure 4 Growth in hypoxic condition leads to skeletal defects and perturbs the expression of DV and skeletal patterning genes.** (A-C) Representative images of embryos at gastrula stage. (A) Embryo grown in normoxic conditions shows normal development of two spicules. (B-C) embryos grown in hypoxic condition show ectopic spicules, indicated by arrowheads. (D-F) Representative images of embryos at pluteus stage. (D) Embryo grown in normoxic conditions shows normal skeleton. (E) Embryo grown in hypoxic condition shows a normal DV axis and ectopic spicule branches. (F) Radialized embryo grown in hypoxic conditions that displays multiple ectopic spicules. LV, lateral view; VV, ventral view. (G) Quantification of skeletogenic phenotypes at gastrula stage and pluteus stage. Color code is indicated in the representative images. Error bars indicates standard deviation of three independent biological replicates. (H-J) Spatial expression of *nodal*, *BMP2/4* and *chordin* genes in normoxic (top) and hypoxic embryos (bottom) at blastula stage. (K-N) Spatial expression of *nodal*, *BMP2/4*, *VEGF* and *VEGFR* genes in normoxic (top) and hypoxic embryos (bottom) at the gastrula stage. Embryos are presented in ventral view and the axis is labeled as V, ventral and D. Throughout H-N, the numbers at the bottom right indicate the number of embryos that show this expression pattern out of all embryos scored, based on three independent biological replicates.



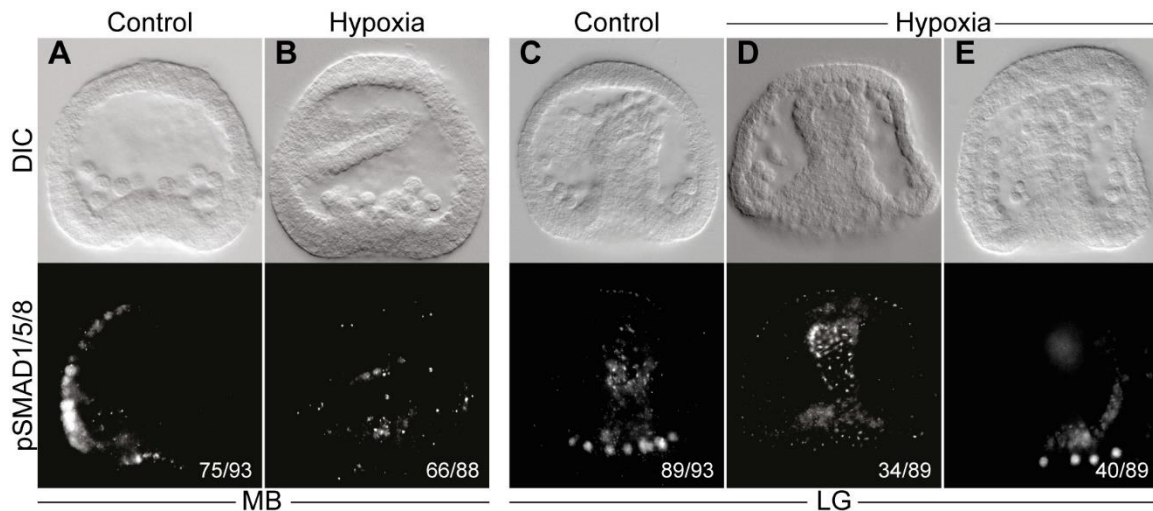

723

724 **Figure 5 BMP activity is reduced in hypoxic conditions.** (A-B) Nuclear pSMAD1/5/8 patterning  
725 in normoxic and hypoxic conditions at mesenchyme blastula (MB) stage. In normoxic conditions,  
726 pSMAD1/5/8 staining is detected in the dorsal ectoderm (A), while in hypoxic embryos the signal  
727 is completely abolished (B). (C-E) pSMAD1/5/8 staining in normoxic vs. hypoxic embryos at late  
728 gastrula (LG) stage. pSMAD1/5/8 is detected in the nuclei of the dorsal skeletogenic cells of  
729 normoxic embryos (C), while in hypoxic conditions the signal is either not detectable (D) or  
730 strongly reduced (E). DIC images of the embryos are presented in the upper row of each panel, and  
731 immunostaining of pSMAD1/5/8 of the embryos are presented in the lower row. All embryos are  
732 presented in lateral view (LV). The numbers shown on the bottom right of each figure indicate the  
733 number of embryos that show this expression pattern out of all embryos scored, based on three  
734 independent biological replicates.

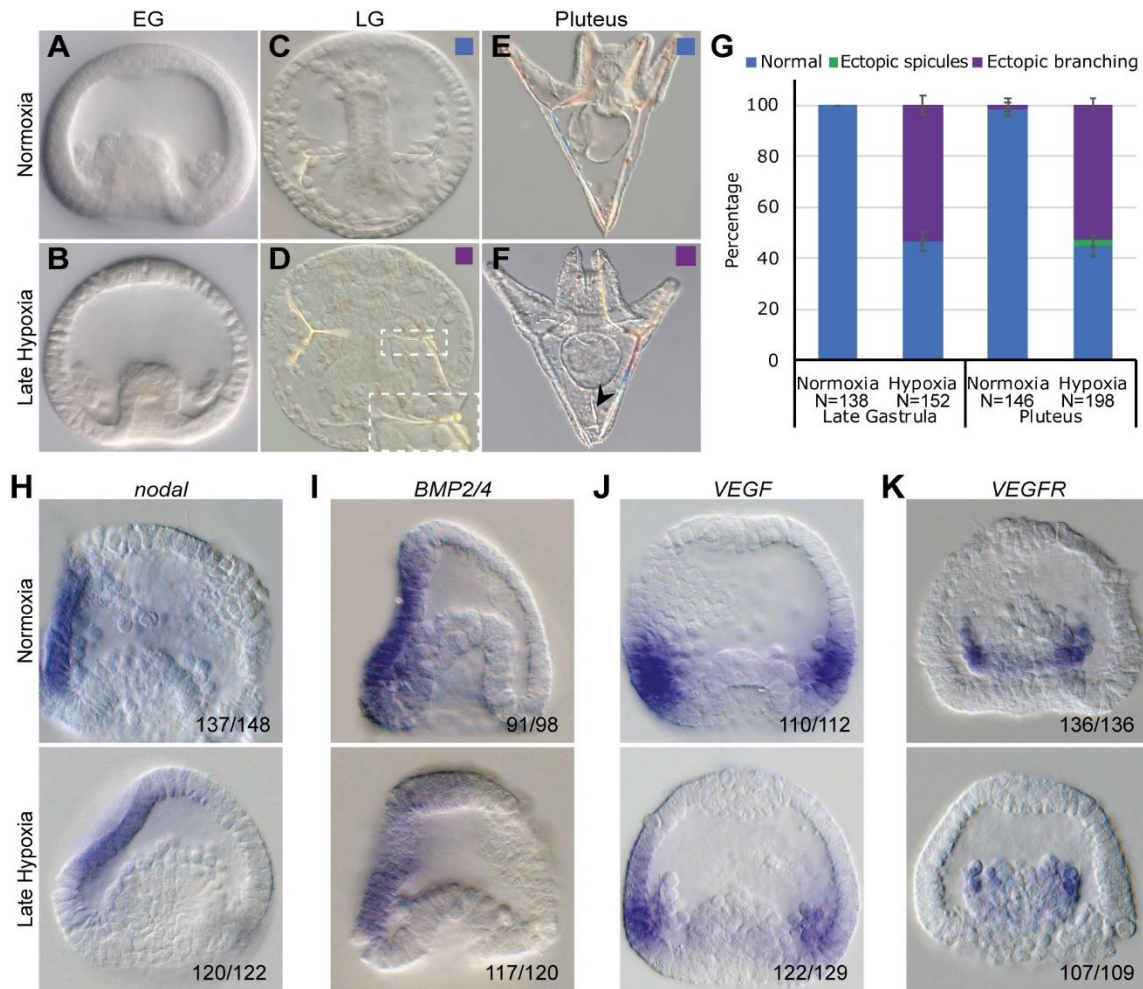

735

736 **Figure 6 Late hypoxia affects skeletal structure but not skeletal patterning.** (A-F)

737 Representative images of live embryos, normoxic embryos are presented in the upper row, and

738 equivalently staged hypoxic embryos are on the bottom. (A-B) Embryos at early gastrula stage

739 show similar morphology in normoxia and hypoxia. (C-D) Hypoxic embryo at late gastrula stage

740 shows two spicules with ectopic spicule branching (D) that are not observed in the normoxic

741 embryo (C). Dashed white square is an enlarged image of the abnormal spicules. (E-F) Embryos

742 at pluteus stage. Arrowhead in F, indicates an abnormal spicule growth in the hypoxic embryo. (G)

743 Quantification of late hypoxia experiment over three biological replicates. Color code is indicated

744 in the representative images. Error bars indicates standard deviation of three independent biological

745 repeats. (H-K) WMISH results of *nodal*, *BMP2/4*, *VEGF* and *VEGFR* at early gastrula stage.

746 Normoxic embryo is presented in the top and hypoxic embryo is in the bottom of each panel. On

747 the bottom right of each figure we indicate the number of embryos that show this expression pattern

748 out of all embryos scored, based on three independent biological replicates.

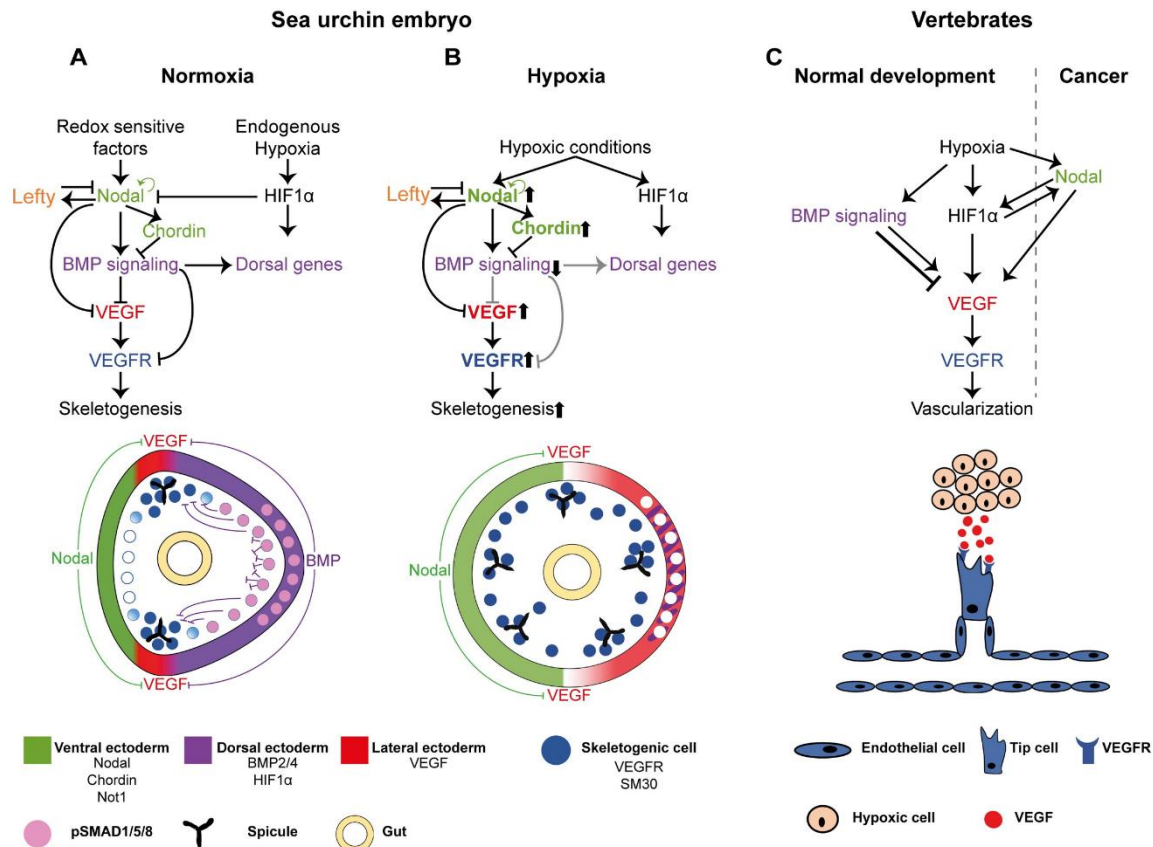

749

750 **Figure 7 The interactions between the DV and skeletogenic GRNs, the response to early**  
 751 **hypoxia and the similarities to the regulation of vertebrate's vascularization. (A-B)** Diagrams  
 752 showing our proposed model for skeletal patterning in normal conditions (A) and Hypoxic  
 753 conditions (B). Color codes are indicated in the bottom part of the figure. (A) The regulatory  
 754 interactions between Nodal, BMP, HIF1α and VEGF signaling during normal development. BMP  
 755 represses *VEGF*, *VEGFR* and *SM30* expression in the dorsal side and HIF1α does not regulate  
 756 VEGF expression in the sea urchin embryo (B) The modification of the regulatory states in hypoxic  
 757 conditions applied at early development, revealed in this work. Early hypoxia expands *nodal*  
 758 expression and reduces BMP activity and the dorsal ectoderm. The reduction of BMP activity leads  
 759 to an expansion of *VEGF*, *VEGFR* and *SM30* expression in the dorsal side and growth of ectopic  
 760 skeletal centers. Ascending arrows near a gene name indicate enhanced activity, while descending  
 761 arrows indicate reduced activity. Gray regulatory links indicate inactive connections under hypoxic  
 762 conditions. (C) Diagram showing the relevant regulatory interactions during vertebrates'  
 763 vascularization in normal development and in cancer, see text for explanations.

764

765
